# Supplementary material for: Inflammatory factors are crucial for the pathogenesis of post-traumatic osteoarthritis confirmed by a novel porcine model: “Idealized” anterior cruciate ligament reconstruction” and gait analysis
Source: Research Square preprint supplement (doi:10.21203/rs.3.rs-269041/v1), 2021-03-04
Supplement: Supplementary file 1 [file 27f4b7aeb69749431b2ac53a.docx]

**Additional Table 1.**  LH:RH ratios of gait parameters

| **Day** | **Group** | **Maximum force** | **Contact area** | **Peak**  **force** | **Impulse** | **Stance**  **time** | **Swing**  **time** |
| --- | --- | --- | --- | --- | --- | --- | --- |
| Day0 | Sham | 1.02 ± 0.06 | 1.03 ± 0.07 | 1.02 ± 0.08 | 0.99 ± 0.06 | 0.99 ± 0.07 | 0.99 ± 0.07 |
| IACL-R | 1.07 ± 0.09 | 1.04 ± 0.08 | 1.04 ± 0.08 | 1.06 ± 0.06 | 1.02 ± 0.06 | 1.00 ± 0.08 |
| Day8 | Sham | 2.25 ± 0.37 | 2.02 ± 0.27 | 1.53 ± 0.21 | 2.91 ± 0.23 | 1.21 ± 0.11 | 0.88 ± 0.12 |
| IACL-R | 8.01 ± 1.59 | 7.59 ± 1.36 | 2.77 ± 0.27 | 13.6 ± 2.62 | 2.01 ± 0.24 | 0.48 ± 0.12 |
| Day16 | Sham | 1.26 ± 0.14 | 1.19 ± 0.12 | 1.20 ± 0.07 | 1.50 ± 0.16 | 1.11 ± 0.09 | 0.94 ± 0.10 |
| IACL-R | 3.19 ± 0.60 | 2.53 ± 0.41 | 1.63 ± 0.13 | 4.62 ± 0.78 | 1.44 ± 0.13 | 0.89 ± 0.05 |
| Day31 | Sham | 1.13 ± 0.10 | 1.08 ± 0.07 | 1.09 ± 0.09 | 1.12 ± 0.11 | 1.09 ± 0.09 | 0.98 ± 0.07 |
| IACL-R | 1.51 ± 0.25 | 1.27 ± 0.14 | 1.23 ± 0.11 | 1.83 ± 0.19 | 1.14 ± 0.12 | 0.94 ± 0.04 |
| Day45 | Sham | 1.08 ± 0.08 | 1.07 ± 0.08 | 1.05 ± 0.09 | 1.11 ± 0.09 | 1.03 ± 0.07 | 1.04 ± 0.07 |
| IACL-R | 1.19 ± 0.08 | 1.15 ± 0.09 | 1.14± 0.11 | 1.14 ± 0.09 | 1.09 ± 0.10 | 0.96 ± 0.07 |
| Day61 | Sham | 1.10 ± 0.08 | 1.09 ± 0.11 | 1.06 ± 0.08 | 1.08 ± 0.11 | 1.04 ± 0.05 | 1.02 ± 0.04 |
| IACL-R | 1.20 ± 0.08 | 1.15 ± 0.09 | 1.11 ± 0.09 | 1.13 ± 0.09 | 1.11 ± 0.10 | 0.99± 0.07 |
| Day75 | Sham | 1.12 ± 0.11 | 1.11 ± 0.09 | 1.04 ± 0.08 | 1.08 ± 0.08 | 1.04 ± 0.06 | 0.98 ± 0.09 |
| IACL-R | 1.68 ± 0.26 | 1.18 ± 0.06 | 1.26 ± 0.13 | 1.86 ± 0.22 | 1.17 ± 0.08 | 0.95 ± 0.08 |
| Day90 | Sham | 1.15 ± 0.10 | 1.09 ± 0.14 | 1.06 ± 0.09 | 1.09 ± 0.08 | 1.04 ± 0.08 | 1.03 ± 0.08 |
| IACL-R | 2.53 ± 0.48 | 1.37 ± 0.06 | 1.55 ± 0.14 | 2.93 ± 0.49 | 1.27 ± 0.10 | 0.94 ± 0.07 |

Data are shown as mean ± SD (n = 7).

LH： left hind limb; RH：right hind limb; IACL-R：idealized anterior cruciate ligament reconstruction
